# Supplementary material for: Exploration of Possible Effects of Cannabis sativa Seed Oil Applied in Different Doses in Ulcerative Colitis Model
Source: Research Square preprint supplement (doi:10.21203/rs.3.rs-8751706/v1), 2026-02-13
Supplement: Supplementary file 1 [file b9c660c5353bd99f8bb00ee2.docx]

**Highlights**

- *Cannabis sativa* seed oil reduces TNBS-induced colonic mucosal damage.
- The 3 ml/kg dose restores antioxidant enzymes (SOD, GPx, and CAT).
- Treatment significantly lowers pro-inflammatory TNF-alpha and IL-1 beta levels.
- Seed oil administration attenuates apoptotic signaling in colon tissues.
- The 3 ml/kg dose exhibits superior efficacy comparable to healthy controls
